# Supplementary material for: Nicotinamide riboside attenuates alcohol induced liver injuries via activation of SirT1/PGC-1α/mitochondrial biosynthesis pathway
Source: PubMed Central journal article supplement — Redox Biol. 2018 Apr 5;17:89–98. doi: 10.1016/j.redox.2018.04.006 (PMC6007172; doi:10.1016/j.redox.2018.04.006), 2018-04-05

# Supplemental Fig. 1

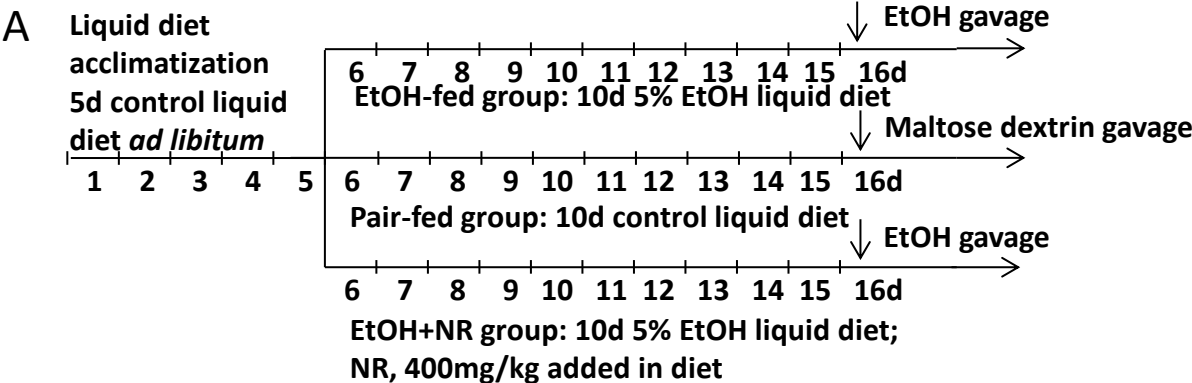

All diets were changed at 5:00 pm every day. Ethanol or maltose dextrin were gavaged at 8:00 am on day 16. Nine hours after gavage, mice were deeply anesthetized and sacrificed.

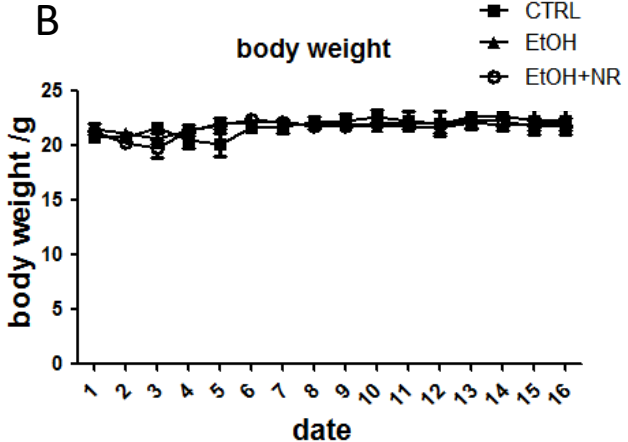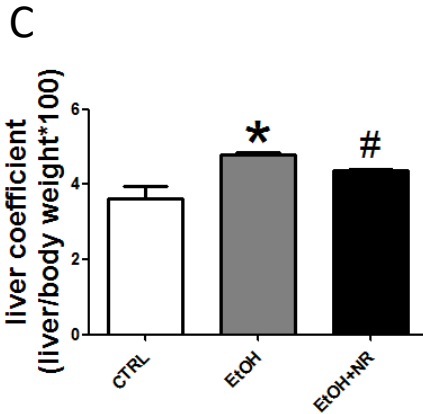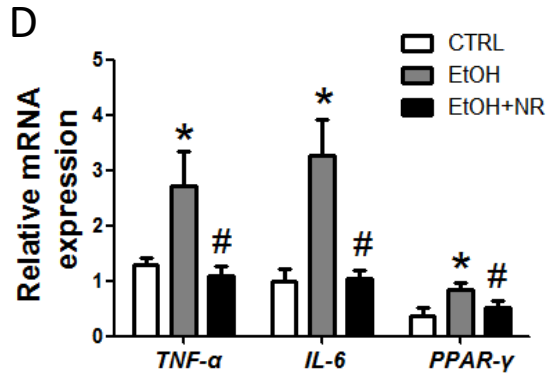

Supplemental Fig. 2

A

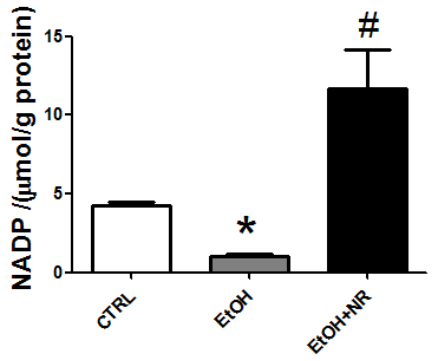

B

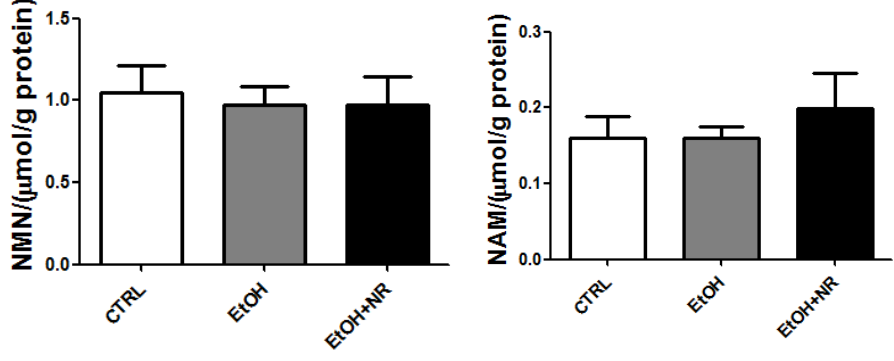

C

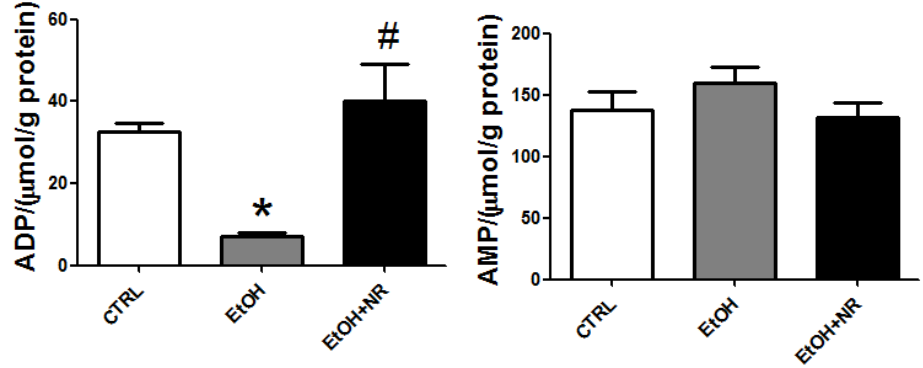

# Supplemental Fig. 3

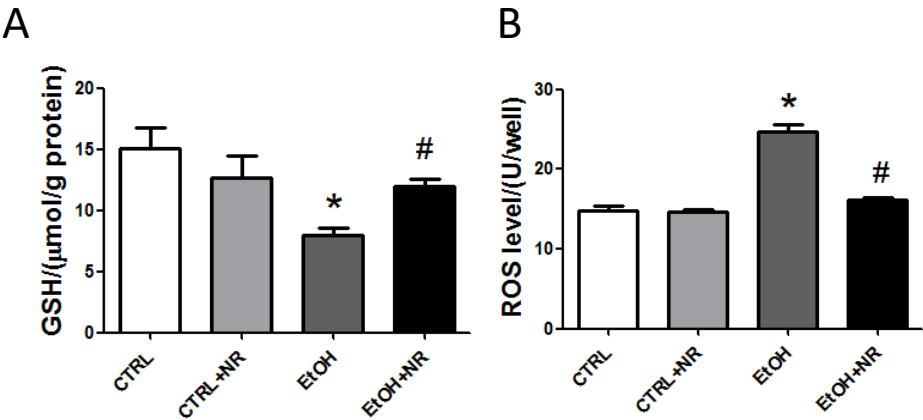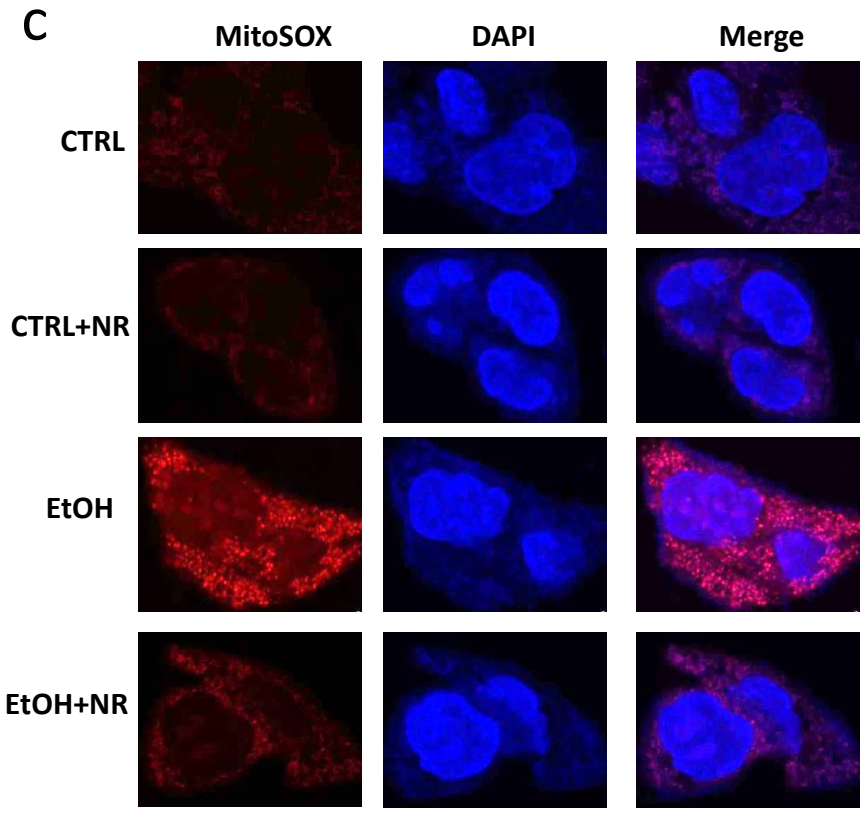

Supplemental Fig. 4

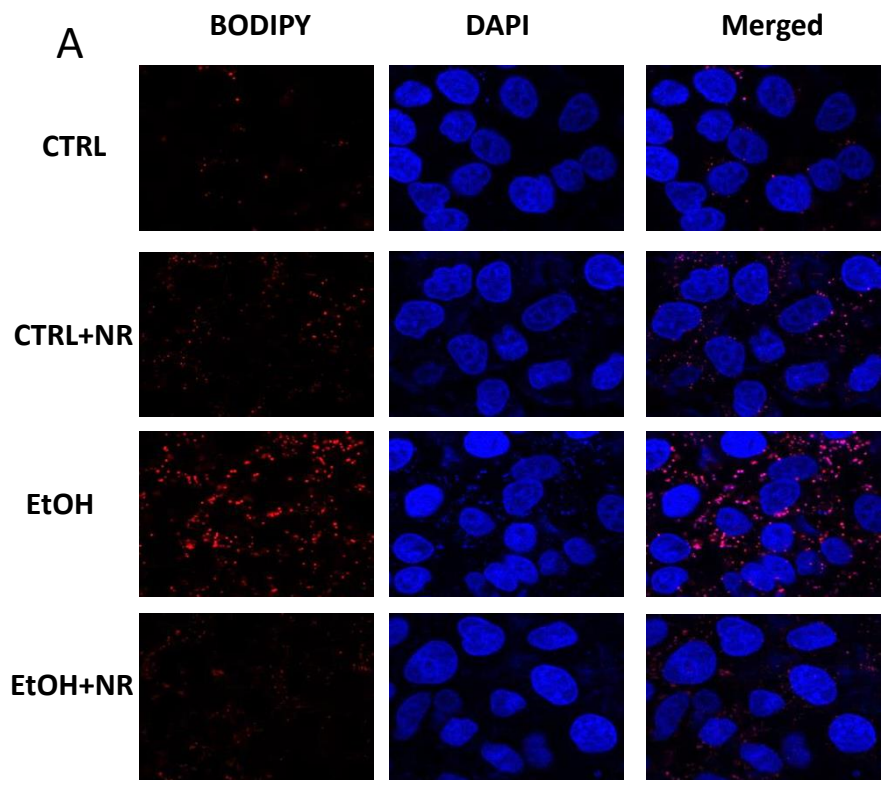

Supplemental Fig. 5

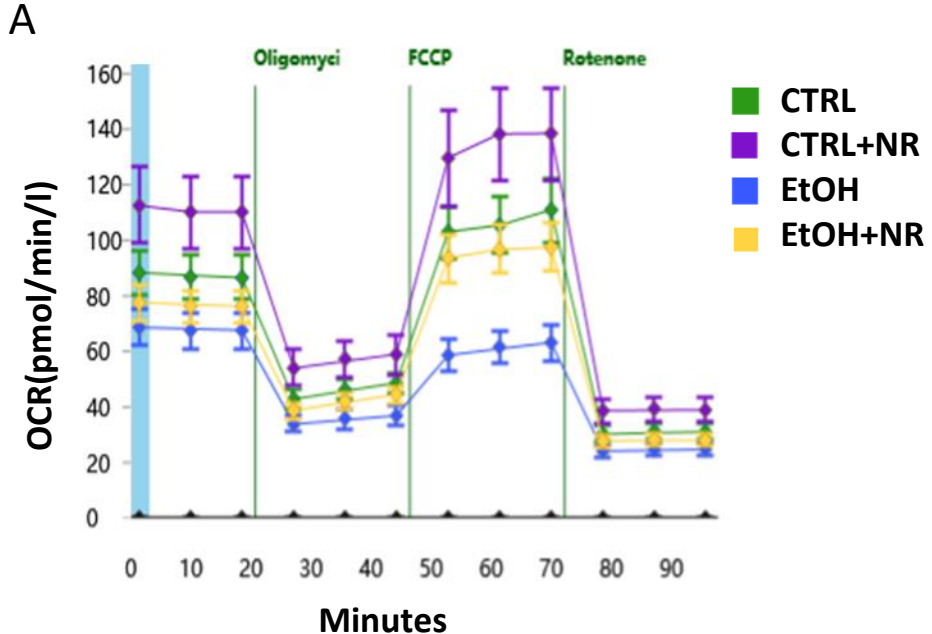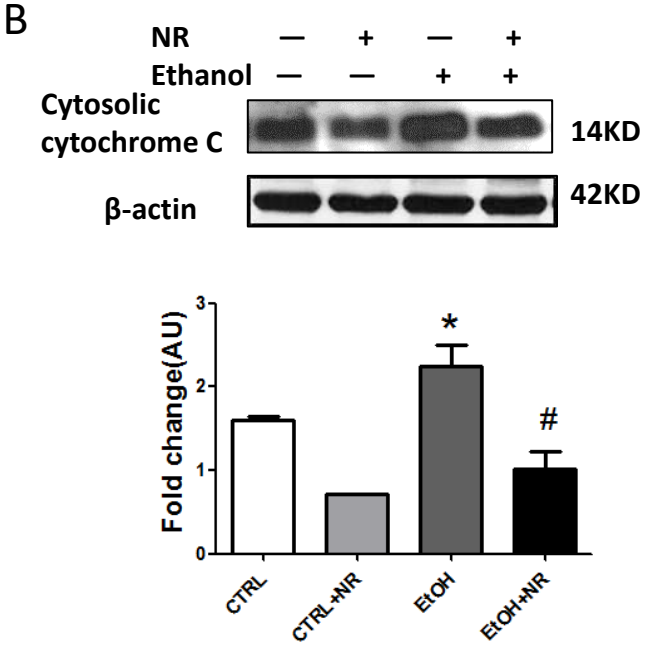

# Supplemental Fig. 6

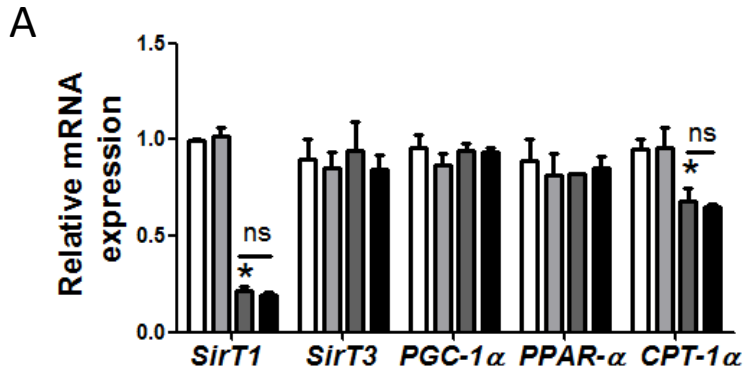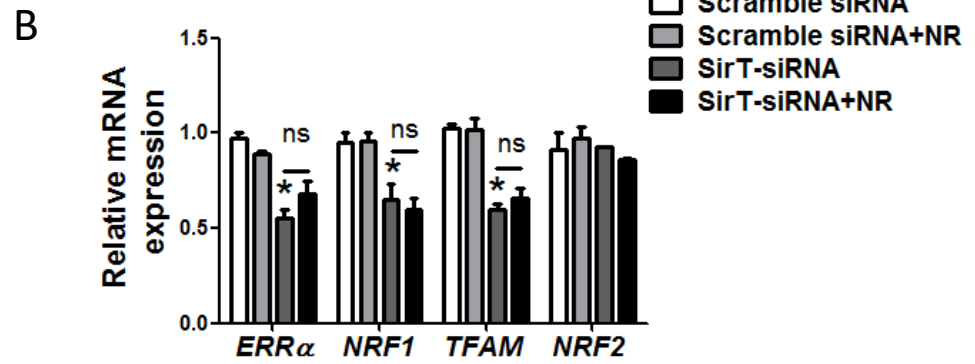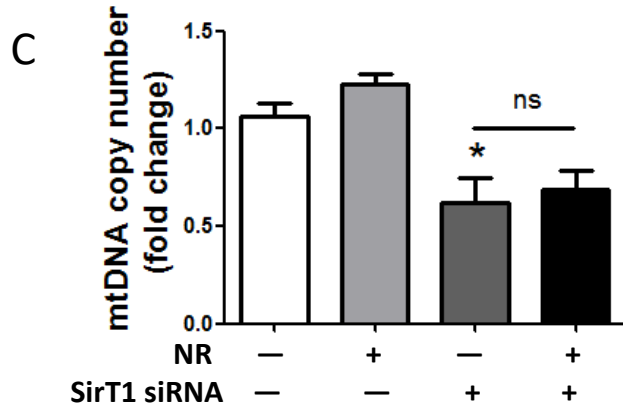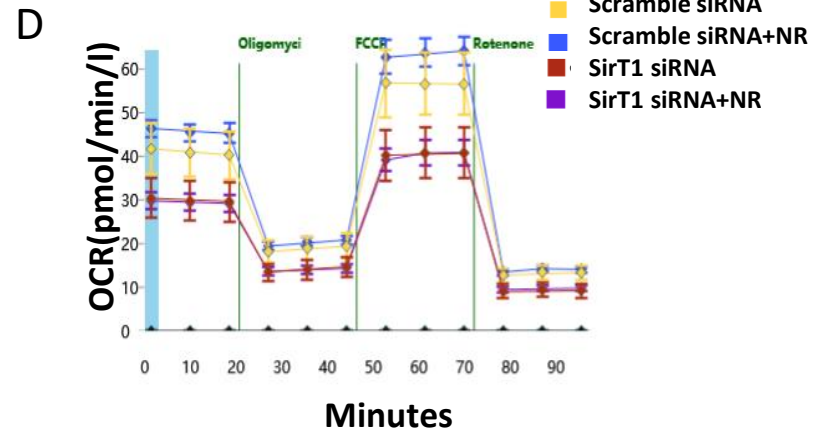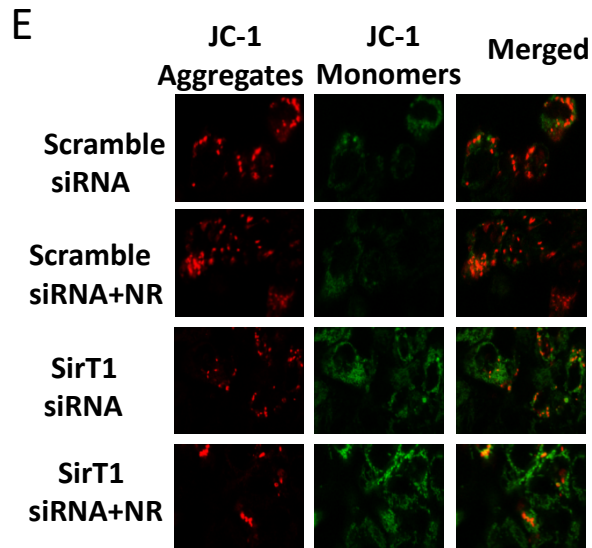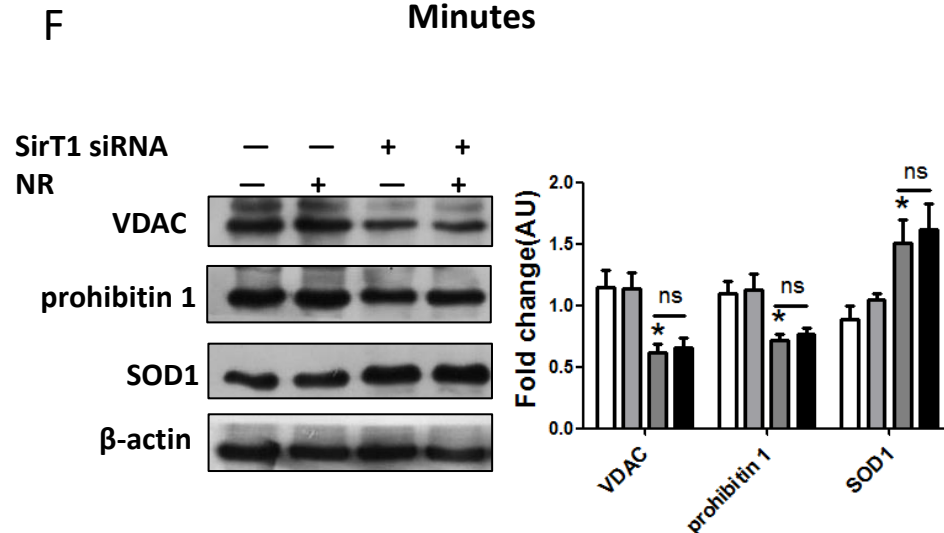

Supplemental Fig. 7

A

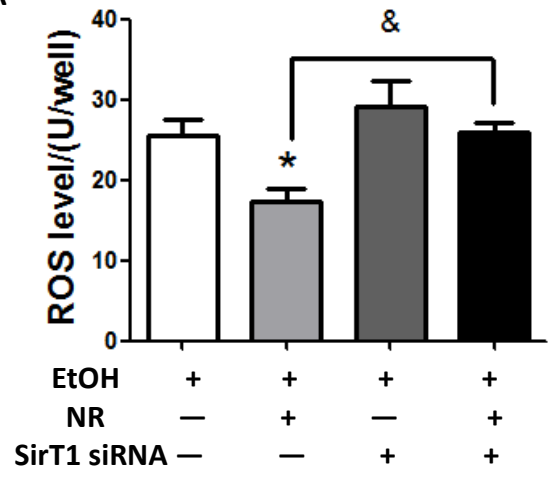

B

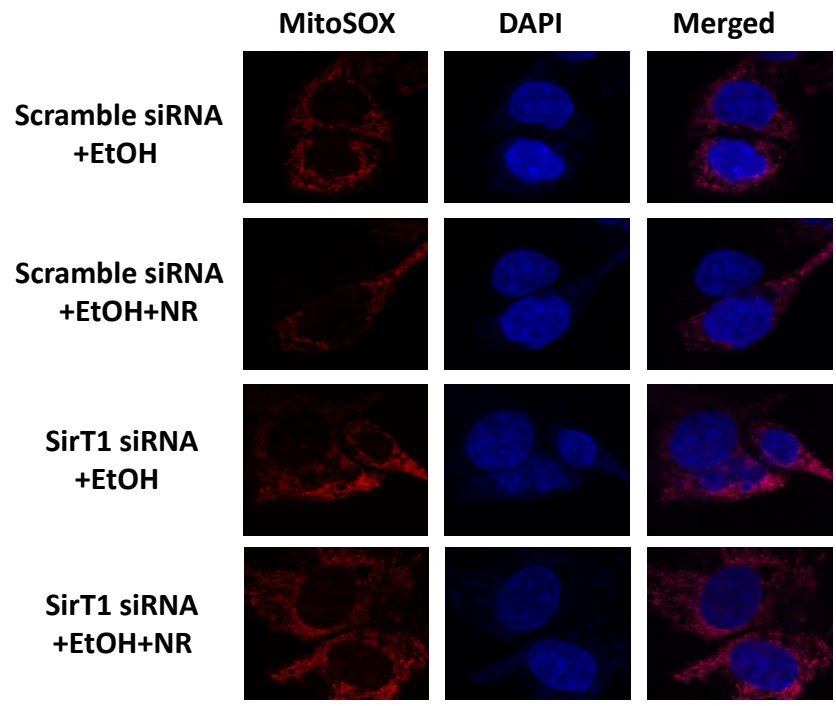

Supplemental Fig. 8

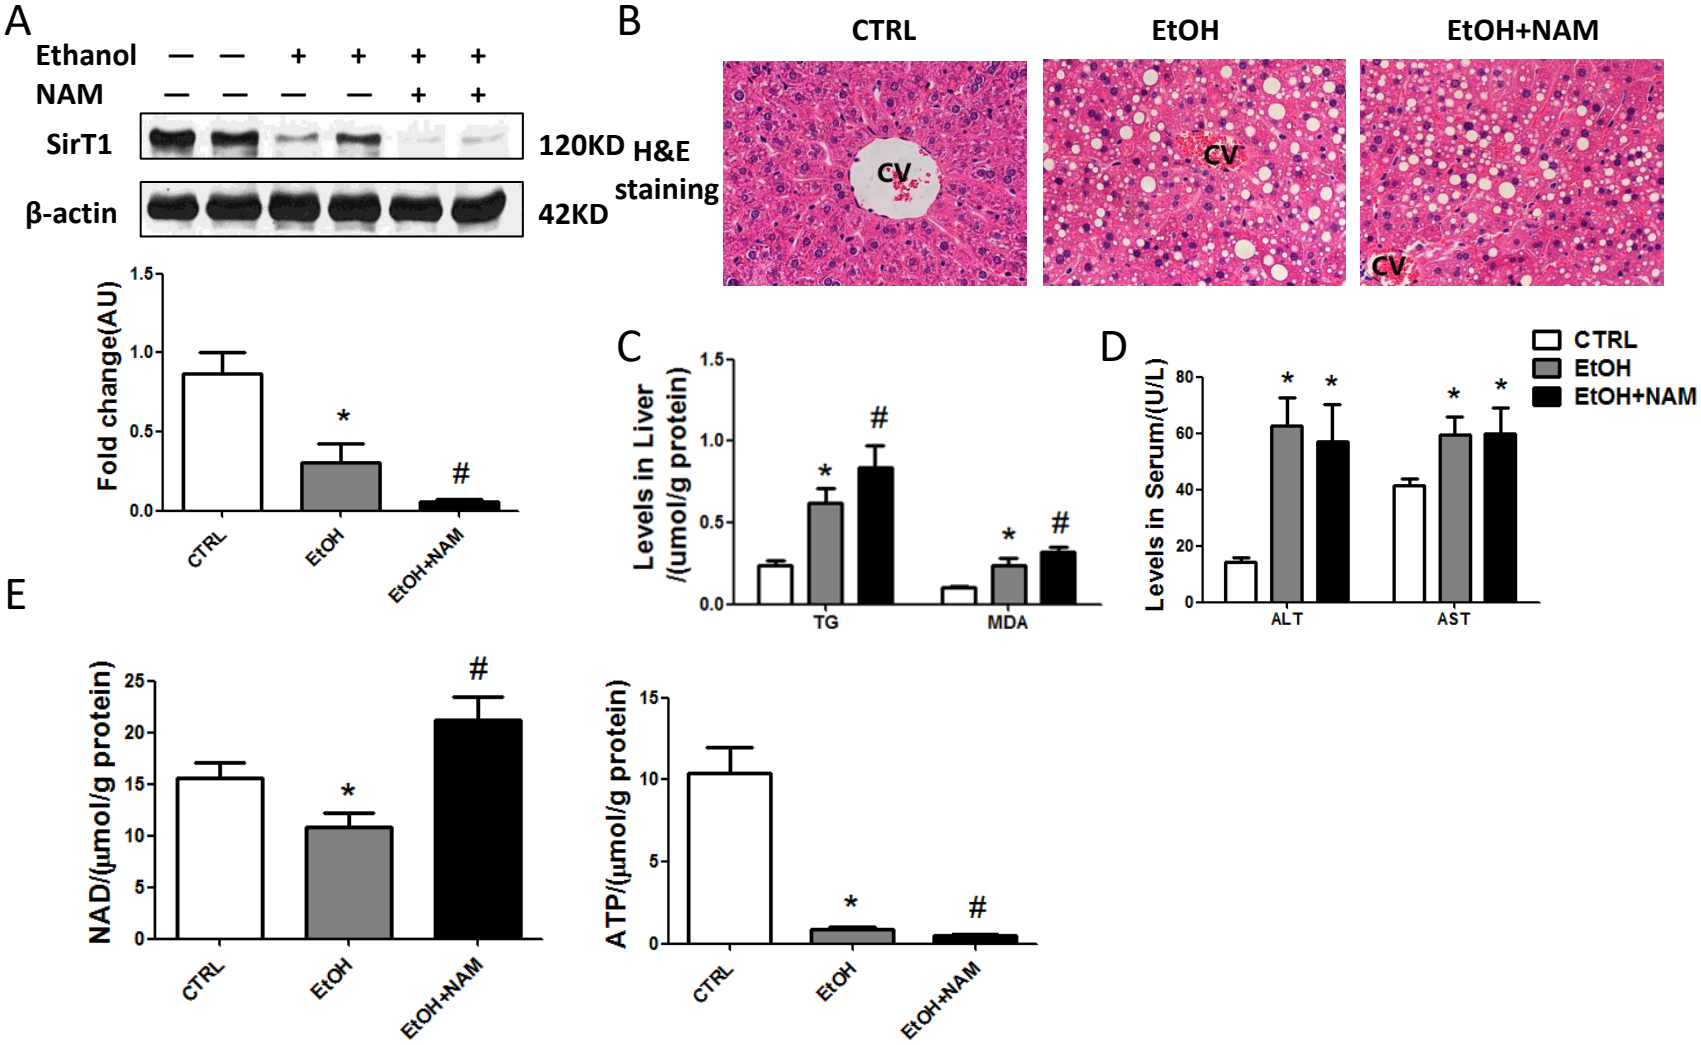

Supplement: mmc2.pdf [file mmc2.pdf]
